# Supplementary material
Source: PubMed Central journal article supplement (PMC4432769)
Supplement: IAI.00380-15_zii999091243so1.pdf [file IAI.00380-15_zii999091243so1.pdf]

Supplementary Figure 1

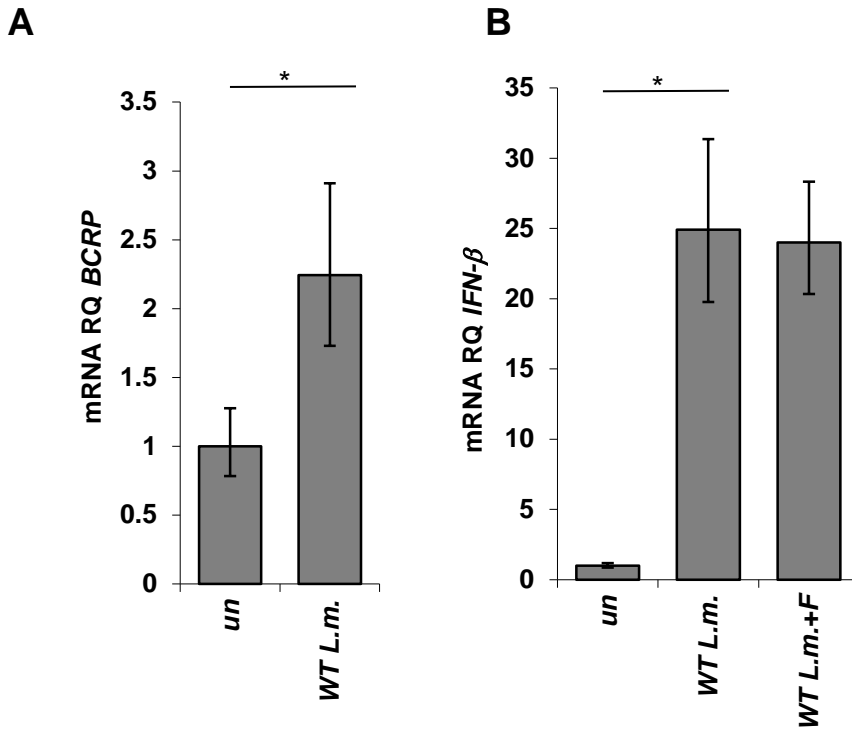

**Fig. S1.** (A) RT-qPCR analysis of BCRP transcription levels in THP1 cells infected with wild-type (WT) *L. monocytogenes*. (B) RT-qPCR analysis of IFN- $\beta$  transcription levels in THP1 cells infected with WT *L. monocytogenes* supplemented with 10  $\mu$ M fumitremorgen C (F). Transcription levels are represented as relative quantity (RQ), relative to uninfected/untreated cells (un). Data represent at least 3 biological repeats. Error bars indicate a 95% confidence interval. \* indicates  $p < 0.01$ .

## Supplementary Figure 2

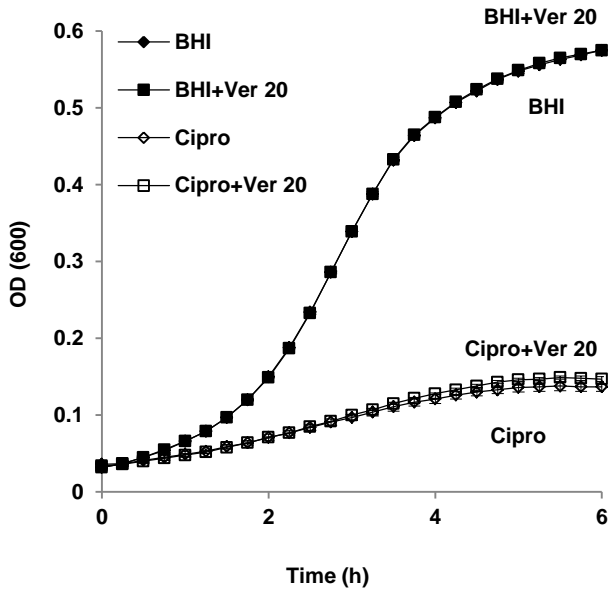

**Fig. S2.** Growth of WT *L. monocytogenes* in BHI medium or in BHI supplemented with 4.5  $\mu\text{M}$  of ciproflaxicine (Cipro) in the presence or absence of 20  $\mu\text{M}$  verapamil (Ver). Representative growth curves of 3 independent experiments are shown. Error bars represent standard deviation of a triplicate and are hidden by the symbols.

### Supplementary Figure 3

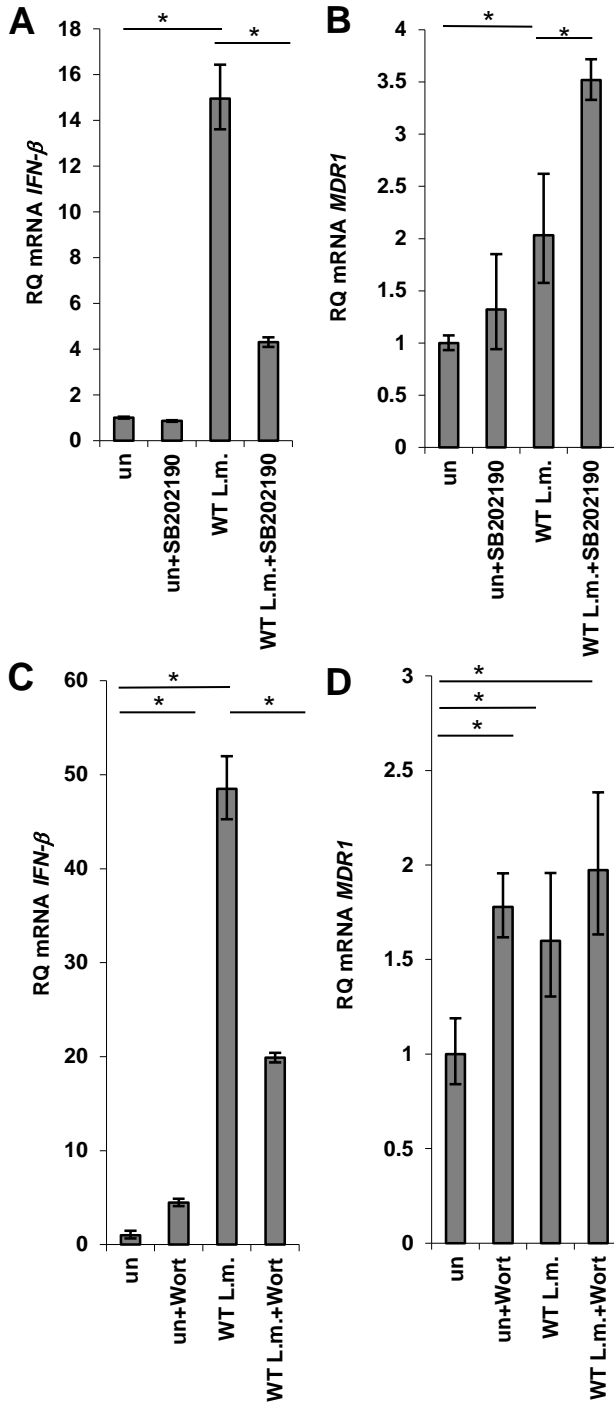

**Fig S3.** The elicitation of  $IFN-\beta$  by THP1 cells in response to intracellular bacteria is mediated by p38 MAPK and PI3K. RT-qPCR analysis of  $IFN-\beta$  transcription levels in THP1 cells infected with WT *L. monocytogenes* and treated with 10  $\mu$ M SB202190 (A, B) or 100 nM wortmannin (Wort) (C, D). Transcription levels are represented as relative quantity (RQ), relative to uninfected/untreated cells (un). Error bars indicate a 95% confidence interval. \* indicates  $p < 0.01$ . Data represents at least 3 biological repeats.
